# Supplementary material for: Unveiling of a novel bifunctional photoreceptor, Dualchrome1, isolated from a cosmopolitan green alga
Source: Research Square preprint supplement (doi:10.21203/rs.3.rs-88004/v1), 2020-10-14
Supplement: Supplementary file 1 [file f925285a32707b3225cc7891.xlsx]

## Sheet: Table S1
	Table S1. Spectral properties of PpPHY and PpCRY
		Chromophore	Dark state	Photoproduct state	Dark state – Photoproduct state
			λmax (nm)	λmax (nm)	Positive (nm)	Negative (nm)
	PpPHY	PCB	612	702	609	702
	PpCRY	FAD	447	366, 399	447	367, 399

## Sheet: Table S2
	Table S2. List of repeat sequences of P. provasolii.
			Number of elements	Length (bp)	Percentage of genome sequence
	Retroelements		402	75922	0.33
		SINEs	24	3067	0.01
		Penelope	108	15140	0.07
		LINEs:	121	16277	0.07
		CRE/SLACS	0	0	0
		L2/CR1/Rex	0	0	0
		R1/LOA/Jockey	13	1137	0.01
		R2/R4/NeSL	0	0	0
		RTE/Bov-B	0	0	0
		L1/CIN4	0	0	0
		LTR elements	257	56578	0.25
		BEL/Pao	14	2716	0.01
		Ty1/Copia	116	25674	0.11
		Gypsy/DIRS1	127	28188	0.12
		Retroviral	0	0	0
	DNA transposons		925	122912	0.54
		hobo-Activator	611	48038	0.21
		Tc1-IS630-Pogo	0	0	0
		En-Spm	0	0	0
		MuDR-IS905	0	0	0
		PiggyBac	0	0	0
		Tourist/Harbinger	0	0	0
		Other	0	0	0
	Rolling-circles		0	0	0
	Unclassified		2195	519535	2.29
	Total interspersed repeats			718369	3.16
	Small RNA		24	3067	0.01
	Satellites		16	3570	0.02
	Simple repeats		21534	869473	3.83
	Low complexity		0	0	0
	Total			1591412	7.01

## Sheet: Table S3
	Table S3. Genome completeness based on BUSCO
	Complete BUSCOs		Fragmented BUSCOs	Missing BUSCOs
	Single-copy	Duplicated
	193 (75.7%)	4 (1.6%)	20 (7.8%)	38 (14.9%)
	BUSCO version 4.0.6 was used with the eukaryota_odb10 database and the option "long".

## Sheet: Table S4
	Table S4. List of the proteins encoded on chromosome 43.
	Protein ID	Annotation
	PP43G0010-T1	hypothetical protein
	PP43G0020-T1	ABC transporter C family protein
	PP43G0030-T1	ATP-binding cassette sub-family C member 9
	PP43G0040-T1	hypothetical protein
	PP43G0050-T1	hypothetical protein
	PP43G0060-T1	hypothetical protein
	PP43G0070-T1	ACT domain-containing protein ACR12-like
	PP43G0080-T1	hypothetical protein
	PP43G0090-T1	probable phospholipase A2
	PP43G0100-T1	hypothetical protein
	PP43G0110-T1	hypothetical protein
	PP43G0120-T1	SDR family oxidoreductase
	PP43G0130-T1	hypothetical protein
	PP43G0140-T1	hypothetical protein
	PP43G0150-T1	deoxycytidylate deaminase
	PP43G0160-T1	phosphodiester glycosidase family protein
	PP43G0170-T1	hypothetical protein
	PP43G0180-T1	hypothetical protein
	PP43G0190-T1	RNA methyltransferase
	PP43G0200-T1	peptidyl-prolyl cis-trans isomerase, FKBP-type
	PP43G0210-T1	hypothetical protein
	PP43G0220-T1	thylakoid lumen protein
	PP43G0230-T1	hypothetical protein
	PP43G0240-T1	hypothetical protein
	PP43G0250-T1	hypothetical protein
	PP43G0260-T1	hypothetical protein
	PP43G0270-T1	zinc metalloproteinase-like protein
	PP43G0280-T1	Alpha-tubulin suppressor
	PP43G0290-T1	metal tolerance protein A1
	PP43G0300-T1	hypothetical protein
	PP43G0310-T1	hypothetical protein
	PP43G0320-T1	translation factor GUF1 homolog, chloroplastic
	PP43G0330-T1	BspA family leucine-rich repeat surface protein
	PP43G0340-T1	sialyltransferase
	PP43G0350-T1	Vegetative incompatibility protein HET-E-1
	PP43G0360-T1	trans-2-enoyl-CoA reductase
	PP43G0370-T1	hypothetical protein
	PP43G0380-T1	1-aminocyclopropane-1-carboxylate synthase
	PP43G0390-T1	sec-independent protein translocase protein TATB, chloroplastic
	PP43G0400-T1	hypothetical protein
	PP43G0410-T1	haloacid dehalogenase-like hydrolase domain-containing protein Sgpp
	PP43G0420-T1	hypothetical protein
	PP43G0430-T1	hypothetical protein
	PP43G0440-T1	RluA family pseudouridine synthase
	PP43G0450-T1	integrase family protein
	PP43G0460-T1	cathepsin b
	PP43G0470-T1	hypothetical protein
	PP43G0480-T1	hypothetical protein
	PP43G0490-T1	adp-glucose pyrophosphorylase
	PP43G0500-T1	hypothetical protein
	PP43G0510-T1	hypothetical protein
	PP43G0520-T1	formyltetrahydrofolate deformylase 1, mitochondrial
	PP43G0530-T1	vegetative incompatibility protein HET-E-1
	PP43G0540-T1	SGNH/GDSL hydrolase family protein
	PP43G0550-T1	60S ribosomal protein L7A family protein
	PP43G0560-T1	cupin domain-containing protein
	PP43G0570-T1	hypothetical protein
	PP43G0580-T1	hypothetical protein
	PP43G0590-T1	hypothetical protein
	PP43G0600-T1	demethoxyubiquinone hydroxylase family protein
	PP43G0610-T1	gamma-glutamyl phosphate reductase
	PP43G0620-T1	metallo-dependent phosphatase
	PP43G0630-T1	hypothetical protein
	The low %GC regions are highlighted in yellow.

## Sheet: Table S5
Table S5. Homologous genes of Arabidopsis photorecepters and signal-transducing genes in genome-determined chlorophytes.
	Organism	PHY	DUC1	plant CRY	plant-like CRY (prasinophyceae-specific CRY)*	CRY-DASH	PIF	COP1	SPA	CK2 alpha	HY5	BIC	CIB1	FT	PHOT
Angiospermae	Arabidopsis thaliana	PhyA-E	-	CRY1 (AT4G08920), CRY2 (AT1G04400)	CRY1 (AT4G08920), CRY2 (AT1G04400)	CRY3 (AT5G24850)	PIF1-8	COP1 (AT2G32950)	SPA1(AT2G46340), SPA2(AT4G11110), SPA3(AT3G15354), SPA4(AT1G53090)	CKA1(AT5G67380), CKA2(AT3G50000), CKA3(AT2G23080), CKA4(AT2G23070)	HY5 (AT5G11260)	BIC1 (AT3G52740), BIC2 (AT3G44450)	CIB1 (AT4G34530 )	FT (AT1G65480)	PHOT1 (AT3G45780), PHOT2 (AT5G58140)
Prasinophytes	Pycnococcus provasolii	-	PP19G2030	PP30G0390, PP30G0680	PP22G1500, PP09G2850	PP01G1390	-	PP02G2630	-	PP06G3600	PP08G2410	-	-	-	PP21G1900
	Bathycoccus prasinos	-	-	-	-	BPRRCC1105_14G00970	-	BPRRCC1105_07G01010	BPRRCC1105_11G03640	BPRRCC1105_07G01510	BPRRCC1105_01G04040	-	-	-	BPRRCC1105_16G02320
	Ostreococcus lucimarinus	-	-	-	-	OL01G06630	-	OL03G04970	-	OL12G02610		-	-	-	OL15G02420
	Ostreococcus sp RC809	-	-	-	-	ORCC809_01G00210	-	ORCC809_06G06020	ORCC809_09G00180	ORCC809_12G03020	ORCC809_01G02660	-	-	-	ORCC809_15G00300
	Ostreococcus tauri	-	-	-	-	OT01G06320	-	OT03G04840	OT10G03510	OT12G02620	OT01G03790	-	-	-	OT16G02900
	Micromonas commoda	-	-	-	MRCC299_07G02380, MRCC299_08G04600	MRCC299_10G00130	-	MRCC299_01G06900	MRCC299_07G01080	MRCC299_07G05450	MRCC299_02G04610	-	-	-	MRCC299_15G00270
	Micromonas pusilla	MP06G04680	-	MP06G04680	MP04G04120, MP05G02170	MP13G00620	-	MP01G02330	MP01G07360	MP01G02900	MP02G06030	-	-	-	MP14G03790
	Chloropicon primus	-	-	gi|1719920757	gi|1719914945	gi|1719917078	-	gi|1719913780	-	gi|1719913368, gi|1719913369, gi|1719918153	-	-	-	-	-
UTC clade	Chlorella sp NC64A	-	-	-	-	CNC64A_008G02490, CNC64A_015G01850	-	CNC64A_003G01980	CNC64A_005G00860	CNC64A_029G00360	-	-	-	CNC64A_013G01430	CNC64A_032G00440
	Coccomyxa sp. C169	-	-	CV12G00810	CV22G01340	CV12G03490	-	-	-	CV04G04720	-	-	-	CV09G02150	CV07G00540
	Volvox carteri	-	-	VC0071G00240	-	VC0037G00700, VC0051G00690	-	-	-	VC0015G01040, VC0060G00470, VC0117G00160	-	-	-	-	VC0018G01970
	Chlamydomonas reinhardtii	-	-	CR06G09700	-	CR01G06350, CR64G00020	-	CR02G02540	CR13G08280	CR12G13820, CR16G03700, CR14G02350	-	-	-	-	CR03G10490
	Ulva mutabilis		-	UM002_0221	UM012_0090	UM012_0157	-	UM081_0078	UM042_0112	UM137_0001	UM004_0120.1	-	-	-	UM005_0073.1
	Domains	PF00360(Phytochrome region) domain	PHY-CRY domains	PF00875(DNA photolyase) and PF03441 (FAD binding domain of DNA photolyase)			No hit with blastp (e value < 1e-10)	Both PF00400(WD domain, G-beta repeat) and Zinc finger, RING type(PF13445,PF13920,PF13923 (at least one of three)) domain.	Both PF00400(WD domain, G-beta repeat) and PF00072(Response regulator receiver domain)	Blast hit with blastp (e value < 1-e20) and possessing the protein kinase domain (PF00069)	PF00170(bZIP transcription factor) or PF07716(Basic region leucine zipper)	No hit with blastp (e value < 1e-10)	No hit with blastp (e value < 1e-10)	PhosphatidylEthanolamine-Binding Protein (PEBP) domain (PF01161)	Both LOV domain/PAS domain (PF13426)and IPR008271 (Serine/threonine-protein kinase)
* Plant like CRY family (13)

## Sheet: Table S6
	Table S6. List of genes for flagella.
	Gene ID	C. reinhardtii Gene ID	Gene name	Function	e-value
	PP15G1350-T1	Cre03.g196050.t1.2		Transition Zone	6.92e-58
	PP01G1780-T1	Cre03.g178150.t1.1	CAM1; RSP20	Radial Spoke; Central Apparatus	1.17e-46
	PP03G3900-T1	Cre03.g178150.t1.1	CAM1; RSP20	Radial Spoke; Central Apparatus	1.5e-95
	PP02G4400-T1	Cre05.g242500.t1.2	RSP4; PF1	Radial Spoke	6.07e-98
	PP02G4410-T1	Cre14.g617500.t1.2	RSP14; FAP132	Radial Spoke	1.53e-44
	PP04G2650-T1	Cre10.g465250.t1.2	RSP11; PF25	Radial Spoke	1.35e-43
	PP06G2340-T1	Cre12.g511050.t1.2	RSP16; HSP40; PF33	Radial Spoke	4.93e-23
	PP08G3920-T1	Cre07.g347050.t1.2	RSP7	Radial Spoke	7.85e-129
	PP08G3740-T1	Cre07.g347050.t1.2	RSP7	Radial Spoke	2.81e-83
	PP11G3250-T1	Cre16.g654300.t1.2	RSP23; NDK5	Radial Spoke	1.64e-27
	PP12G2850-T1	Cre01.g005450.t1.2	RSP10	Radial Spoke	1.22e-40
	PP15G1100-T1	Cre06.g291700.t1.2	RSP3; PF14	Radial Spoke	5.14e-26
	PP27G0830-T1	Cre02.g114700.t1.2	RSP12; CYN17	Radial Spoke	5.09e-35
	PP29G1490-T1	Cre07.g330200.t1.2	RSP9; PF17	Radial Spoke	2.3e-52
	PP29G0770-T1	Cre16.g654300.t1.2	RSP23; NDK5	Radial Spoke	2.81e-89
	PP33G1490-T1	Cre10.g427300.t1.2	RSP2; PF24	Radial Spoke	2.79e-31
	PP37G1700-T1	Cre12.g511050.t1.2	RSP16; HSP40; PF33	Radial Spoke	1.81e-40
	PP40G1040-T1	Cre02.g078600.t1.2	RSP8	Radial Spoke	1.74e-52
	PP12G1790-T1	Cre09.g411450.t1.2	DAP1; PF13; DNAAF2; Ktu	Outer Arm Dynein, Inner Arm Dynein	3.9e-41
	PP01G4720-T1	Cre01.g029750.t1.1	DAAK1; FAK1	Outer Arm Dynein	1.64e-61
	PP01G2590-T1	Cre10.g428850.t1.2	DLT1; ODA-LC9	Outer Arm Dynein	1.67e-40
	PP02G0590-T1	Cre11.g476050.t1.2	DHC15; ODA-DHCgamma; ODA2; PF28	Outer Arm Dynein	1.08e-23
	PP03G1490-T1	Cre03.g145127.t1.1	DHC13; ODA-DHCalpha	Outer Arm Dynein	9.36e-42
	PP03G2690-T1	Cre12.g552900.t1.2	DOI1; LIS1	Outer Arm Dynein	5.96e-30
	PP04G2740-T1	Cre04.g216902.t1.1	DAW1; ODA16; WDR69	Outer Arm Dynein	0
	PP05G2430-T1	Cre04.g216902.t1.1	DAW1; ODA16; WDR69	Outer Arm Dynein	5.16e-30
	PP05G3420-T1	Cre12.g552900.t1.2	DOI1; LIS1	Outer Arm Dynein	4.72e-36
	PP17G1370-T1	Cre12.g552900.t1.2	DOI1; LIS1	Outer Arm Dynein	7.15e-23
	PP19G1500-T1	Cre01.g029150.t1.2	DAU1; ODA7; DNAAF1; LRRC50	Outer Arm Dynein	4.89e-26
	PP23G0960-T1	Cre12.g528850.t1.1	DLX1; ODA-LC3; DLC3	Outer Arm Dynein	5.22e-30
	PP28G1080-T1	Cre01.g029750.t1.1	DAAK1; FAK1	Outer Arm Dynein	4.03e-25
	PP31G0500-T1	Cre33.g759047.t1.1		Outer Arm Dynein	4.16e-39
	PP31G1910-T1	Cre12.g506000.t1.2	DIC2; ODA-IC2; ODA6; IC69; IC70	Outer Arm Dynein	0
	PP31G1360-T1	Cre01.g051250.t1.2	DLE1; ODA-LC4; DLC4	Outer Arm Dynein	3.25e-53
	PP34G0200-T1	Cre09.g403800.t1.2	DHC14; ODA-DHCbeta; ODA4	Outer Arm Dynein	1.79e-53
	PP35G1250-T1	Cre03.g187200.t1.2	DLL2; ODA-LC6; ODA13	Outer Arm Dynein	1.04e-39
	PP18G1930-T1	Cre11.g475150.t1.2		Membrane	5.32e-28
	PP01G3570-T1	Cre07.g340450.t1.1	PKHD1	Membrane	7.04e-47
	PP02G3940-T1	Cre03.g152850.t1.2		Membrane	2.88e-75
	PP03G4560-T1	Cre17.g715300.t1.2	PKD2	Membrane	5.38e-57
	PP04G3520-T1	Cre07.g340450.t1.1	PKHD1	Membrane	1.14e-21
	PP09G0010-T1	Cre11.g475150.t1.2		Membrane	9.48e-31
	PP22G0200-T1	Cre17.g715300.t1.2	PKD2	Membrane	1.54e-121
	PP28G0420-T1	Cre11.g475150.t1.2		Membrane	7e-29
	PP39G0430-T1	Cre17.g715300.t1.2	PKD2	Membrane	3.61e-68
	PP18G1630-T1	Cre10.g467000.t1.2	IFT57	Intraflagellar Transport	2.02e-115
	PP18G1950-T1	Cre17.g730950.t1.2	FLA10; KIN2-2	Intraflagellar Transport	8.81e-30
	PP07G2590-T1	Cre12.g522550.t1.2	FLA8; KIN2-1	Intraflagellar Transport	5.82e-86
	PP07G1810-T1	Cre17.g730950.t1.2	FLA10; KIN2-2	Intraflagellar Transport	0
	PP01G3310-T1	Cre10.g449250.t1.2	KAP1	Intraflagellar Transport	0
	PP01G1320-T1	Cre11.g467616.t1.1	IFT56; Dyf-13; Ttc26	Intraflagellar Transport	0
	PP02G3160-T1	Cre06.g257250.t1.1	BBS2	Intraflagellar Transport	0
	PP02G3270-T1	Cre04.g219700.t3.1	BBS9	Intraflagellar Transport	0
	PP02G4110-T1	Cre06.g267550.t1.2	BBS5	Intraflagellar Transport	6.3e-141
	PP03G2500-T1	Cre09.g398882.t1.1	DLI1; D1bLIC	Intraflagellar Transport	9.08e-90
	PP04G0920-T1	Cre12.g520650.t1.2	TLP1	Intraflagellar Transport	3.35e-112
	PP04G3380-T1	Cre06.g250300.t1.2	DHC16; DHC1b; FLA24	Intraflagellar Transport	1.35e-55
	PP04G4570-T1	Cre12.g522550.t1.2	FLA8; KIN2-1	Intraflagellar Transport	6.51e-47
	PP05G2160-T1	Cre12.g522550.t1.2	FLA8; KIN2-1	Intraflagellar Transport	7.8e-95
	PP10G1580-T1	Cre01.g027950.t1.2	IFT74; IFT72; IFT71; CMG1	Intraflagellar Transport	4.97e-100
	PP12G1460-T1	Cre12.g522550.t1.2	FLA8; KIN2-1	Intraflagellar Transport	1.15e-30
	PP13G2620-T1	Cre12.g522550.t1.2	FLA8; KIN2-1	Intraflagellar Transport	6e-63
	PP14G0870-T1	Cre17.g721250.t1.2	IFT38; FAP22; Qilin; Dyf-3; Cluap1; CFAP22	Intraflagellar Transport	4.79e-107
	PP14G2370-T1	Cre12.g522550.t1.2	FLA8; KIN2-1	Intraflagellar Transport	4.74e-36
	PP17G2340-T1	Cre11.g467739.t1.1	IFT54; FAP116; Dyf-11; Elipsa; Traf3ip1	Intraflagellar Transport	1.66e-36
	PP22G0380-T1	Cre16.g666500.t1.2	BBS8; TTC8	Intraflagellar Transport	0
	PP23G2090-T1	Cre17.g703900.t1.2	IFT172; SLB	Intraflagellar Transport	0
	PP25G0680-T1	Cre12.g522550.t1.2	FLA8; KIN2-1	Intraflagellar Transport	1.39e-59
	PP28G0060-T1	Cre01.g065822.t1.1	IFT122; FAP80	Intraflagellar Transport	1.15e-111
	PP31G1390-T1	Cre12.g522550.t1.2	FLA8; KIN2-1	Intraflagellar Transport	6.89e-80
	PP34G0330-T1	Cre06.g250300.t1.2	DHC16; DHC1b; FLA24	Intraflagellar Transport	7.66e-41
	PP35G1760-T1	Cre08.g362650.t1.1	IFT140	Intraflagellar Transport	5.34e-89
	PP35G1570-T1	Cre07.g335750.t1.1	IFT88	Intraflagellar Transport	0
	PP35G1620-T1	Cre12.g548650.t1.1	BBS4; PTX5	Intraflagellar Transport	0
	PP35G0360-T1	Cre12.g520650.t1.2	TLP1	Intraflagellar Transport	1.02e-24
	PP37G0580-T1	Cre10.g450350.t1.2	IFT25; FAP232; Hspb11	Intraflagellar Transport	1.62e-35
	PP37G0630-T1	Cre17.g730950.t1.2	FLA10; KIN2-2	Intraflagellar Transport	6.89e-47
	PP03G1210-T1	Cre09.g394213.t1.1	DLT4; Tctex2b	Inner Arm Dynein; Intraflagellar Transport	1.52e-44
	PP09G3360-T1	Cre01.g004250.t1.2	DLT3; TCTEX1	Inner Arm Dynein; Intraflagellar Transport	3.08e-53
	PP24G1590-T1	Cre12.g546400.t1.2	DLR2; DLC7b	Inner Arm Dynein; Intraflagellar Transport	1.63e-37
	PP07G3190-T1	Cre11.g468450.t1.2	DLE2; VFL2; Caltractin; Centrin	Inner Arm Dynein	9.88e-87
	PP01G4300-T1	Cre13.g603700.t1.2	DII4; IDA5; ACT1; Actin	Inner Arm Dynein	0
	PP05G3460-T1	Cre02.g141606.t1.1	DHC9	Inner Arm Dynein	3.01e-107
	PP06G0170-T1	Cre13.g603700.t1.2	DII4; IDA5; ACT1; Actin	Inner Arm Dynein	1.06e-84
	PP06G3920-T1	Cre13.g603700.t1.2	DII4; IDA5; ACT1; Actin	Inner Arm Dynein	2.21e-26
	PP06G4130-T1	Cre12.g484250.t1.1	DHC1; IA1-DHC1alpha; PF9	Inner Arm Dynein	0
	PP09G2840-T1	Cre09.g392282.t1.1	DHC2	Inner Arm Dynein	0
	PP09G0050-T1	Cre13.g603700.t1.2	DII4; IDA5; ACT1; Actin	Inner Arm Dynein	0
	PP12G2520-T1	Cre12.g494800.t1.1	DII1; IDA-IC28; p28; IDA4	Inner Arm Dynein	4.94e-116
	PP16G0980-T1	Cre14.g627576.t1.1	DHC7	Inner Arm Dynein	0
	PP17G0030-T1	Cre13.g603700.t1.2	DII4; IDA5; ACT1; Actin	Inner Arm Dynein	1.96e-38
	PP24G1520-T1	Cre13.g603700.t1.2	DII4; IDA5; ACT1; Actin	Inner Arm Dynein	1.07e-40
	PP24G1100-T1	Cre14.g624950.t1.1	DHC10; IA1-DHC1beta; IDA2	Inner Arm Dynein	0
	PP25G1340-T1	Cre14.g627576.t1.1	DHC7	Inner Arm Dynein	4.05e-63
	PP25G1750-T1	Cre11.g468450.t1.2	DLE2; VFL2; Caltractin; Centrin	Inner Arm Dynein	1.56e-46
	PP25G0130-T1	Cre03.g186300.t1.2	DII2; FAP146; p38	Inner Arm Dynein	3.15e-132
	PP25G1980-T1	Cre14.g627576.t1.1	DHC7	Inner Arm Dynein	0
	PP29G0200-T1	Cre03.g205000.t1.1	IDA3	Inner Arm Dynein	3.33e-23
	PP30G0710-T1	Cre11.g468450.t1.2	DLE2; VFL2; Caltractin; Centrin	Inner Arm Dynein	9.14e-36
	PP34G0350-T1	Cre13.g603700.t1.2	DII4; IDA5; ACT1; Actin	Inner Arm Dynein	4.16e-73
	PP36G0850-T1	Cre02.g141606.t1.1	DHC9	Inner Arm Dynein	4.19e-65
	PP07G3500-T1	Cre07.g325762.t1.1	DRC11; FAP82; FBB15	Dynein Regulatory Complex	0
	PP10G2170-T1	Cre16.g676645.t1.1	DRC8; FAP200; CFAP200	Dynein Regulatory Complex	2.68e-34
	PP11G2080-T1	Cre01.g045350.t1.2	DRC5; FAP155	Dynein Regulatory Complex	4.66e-74
	PP14G2670-T1	Cre01.g025450.t1.2	DRC9; FAP122; CFAP122	Dynein Regulatory Complex	1.07e-32
	PP19G1730-T1	Cre13.g607750.t1.2	DRC2; FAP250; CCDC65; IDA6; CFAP250	Dynein Regulatory Complex	2.71e-76
	PP21G2080-T1	Cre02.g141350.t1.2	DRC10; FAP84; CFAP84	Dynein Regulatory Complex	9.24e-40
	PP03G1010-T1	Cre12.g516950.t1.2	SAS6; BLD12	Centriole	4.02e-79
	PP20G1650-T1	Cre07.g332950.t1.2	SFA1; SF-assemblin	Centriole	3.89e-38
	PP18G0580-T1	Cre04.g227900.t1.2	PF20	Central Apparatus	9.4e-48
	PP18G0830-T1	Cre02.g112100.t1.1	FAP101; C1a-86; PF6-IP1	Central Apparatus	3.62e-22
	PP18G1760-T1	Cre12.g522150.t1.1	FAP194	Central Apparatus	1.22e-24
	PP18G2240-T1	Cre08.g364000.t1.1	FAP413	Central Apparatus	5.43e-147
	PP07G1240-T1	Cre06.g256450.t1.2	FAP119; C1a-34; PF6-IP2	Central Apparatus	2.55e-57
	PP07G3830-T1	Cre08.g364000.t1.1	FAP413	Central Apparatus	2.41e-81
	PP07G0310-T1	Cre08.g364000.t1.1	FAP413	Central Apparatus	1.15e-31
	PP07G1480-T1	Cre08.g364000.t1.1	FAP413	Central Apparatus	2.75e-56
	PP01G3440-T1	Cre08.g364000.t1.1	FAP413	Central Apparatus	6.16e-43
	PP02G4520-T1	Cre02.g105950.t1.2	FAP174	Central Apparatus	3.04e-23
	PP02G2160-T1	Cre08.g364000.t1.1	FAP413	Central Apparatus	2e-24
	PP04G0720-T1	Cre12.g513200.t1.2	PGH1; ENO	Central Apparatus	2.2e-175
	PP04G2270-T1	Cre08.g364000.t1.1	FAP413	Central Apparatus	8.44e-26
	PP05G2650-T1	Cre08.g364000.t1.1	FAP413	Central Apparatus	3.94e-25
	PP06G3740-T1	Cre08.g364000.t1.1	FAP413	Central Apparatus	1.88e-28
	PP06G1600-T1	Cre02.g145100.t1.1	FAP39; CFAP39	Central Apparatus	8.51e-38
	PP06G4370-T1	Cre16.g690450.t1.1	FAP266	Central Apparatus	1.33e-26
	PP08G0830-T1	Cre12.g509800.t1.2	FAP286	Central Apparatus	9.64e-36
	PP08G2750-T1	Cre12.g519950.t1.1	FAP42; C1b-350; GUK3	Central Apparatus	2.55e-37
	PP09G0990-T1	Cre08.g364000.t1.1	FAP413	Central Apparatus	1.54e-150
	PP09G2540-T1	Cre08.g364000.t1.1	FAP413	Central Apparatus	3.21e-26
	PP10G3130-T1	Cre08.g364000.t1.1	FAP413	Central Apparatus	7.94e-71
	PP13G2110-T1	Cre07.g354551.t1.2	FAP65; CFAP65; AKAP240	Central Apparatus	7.14e-35
	PP14G0680-T1	Cre49.g761347.t1.1	FAP360; FAP221L; Pcdp1	Central Apparatus	3.52e-33
	PP16G1700-T1	Cre08.g364000.t1.1	FAP413	Central Apparatus	2.99e-25
	PP16G1750-T1	Cre08.g364000.t1.1	FAP413	Central Apparatus	5.65e-25
	PP17G0190-T1	Cre08.g372100.t1.2	HSP70; HSP70A	Central Apparatus	0
	PP19G1300-T1	Cre08.g364000.t1.1	FAP413	Central Apparatus	2.81e-58
	PP20G1750-T1	Cre08.g364000.t1.1	FAP413	Central Apparatus	1.3e-30
	PP21G1850-T1	Cre12.g513200.t1.2	PGH1; ENO	Central Apparatus	0
	PP22G0770-T1	Cre08.g364000.t1.1	FAP413	Central Apparatus	2.58e-48
	PP23G1810-T1	Cre08.g364000.t1.1	FAP413	Central Apparatus	1.75e-76
	PP24G1930-T1	Cre08.g364000.t1.1	FAP413	Central Apparatus	1.42e-29
	PP25G0170-T1	Cre17.g729850.t1.2	FAP227; C1a-18; PF6-IP4	Central Apparatus	3.7e-41
	PP28G1380-T1	Cre08.g364000.t1.1	FAP413	Central Apparatus	1.15e-29
	PP30G1360-T1	Cre17.g704300.t1.1	FAP47; CFAP47	Central Apparatus	2.34e-34
	PP30G1420-T1	Cre04.g224250.t1.1	FAP147	Central Apparatus	2.15e-21
	PP33G1280-T1	Cre03.g145387.t1.1	FAP239	Central Apparatus	1.3e-43
	PP33G0140-T1	Cre11.g482300.t1.2	FAP305; MOT17	Central Apparatus	4.81e-38
	PP35G0480-T1	Cre01.g025400.t1.2	HYDIN; HYD3	Central Apparatus	4.68e-172
	PP37G0060-T1	Cre08.g364000.t1.1	FAP413	Central Apparatus	6.68e-33
	PP43G0530-T1	Cre08.g364000.t1.1	FAP413	Central Apparatus	2.01e-144
	PP08G1130-T1	Cre12.g549550.t1.2	TUB2	Axoneme; Transition Zone	2.88e-63
	PP26G0100-T1	Cre12.g549550.t1.2	TUB2	Axoneme; Transition Zone	0
	PP26G0640-T1	Cre12.g549550.t1.2	TUB2	Axoneme; Transition Zone	2.72e-74
	PP27G0930-T1	Cre04.g216850.t1.2	TUA2	Axoneme; Transition Zone	0
	PP27G1470-T1	Cre04.g216850.t1.2	TUA2	Axoneme; Transition Zone	4.58e-94
	PP32G1920-T1	Cre04.g216850.t1.2	TUA2	Axoneme; Transition Zone	0
	PP03G3500-T1	Cre03.g178500.t1.2	Rib43; Rib43a	Axoneme	6.23e-52
	PP04G4710-T1	Cre02.g091700.t1.2	RIB72	Axoneme	9.33e-134
	PP05G1020-T1	Cre04.g216250.t1.2	FAP276	Axoneme	5.26e-24
	PP09G1850-T1	Cre02.g091700.t1.2	RIB72	Axoneme	3.72e-125
	PP13G2860-T1	Cre17.g741200.t1.2	EBP1; EB1	Axoneme	1.41e-60
	PP13G0440-T1	Cre02.g113400.t1.2	PACRG	Axoneme	1.98e-154
	PP14G2400-T1	Cre07.g351650.t1.1	FAP20; BUG22; CFAP20; Gtl3	Axoneme	1.16e-129
	PP25G0120-T1	Cre09.g393954.t1.1	FAP106; CFAP106	Axoneme	1.47e-61
	Annotation was performed using blastp to the Chlamydomonas Flagellar Proteome Project database (Pazour et al. 2005) with a cut-off: e-value < 1.0E-20.

## Sheet: Table S7
	Table S7. List of CAZy genes in the P. provasolii genome.
	Gene ID	CAZy	SignalP (Yes/No)
	PP01G0400-T1	GT29(306-520)	N
	PP01G0900-T1	GH3(136-364)	Y(1-39)
	PP01G0980-T1	GT5(1534-1975)	N
	PP01G1540-T1	CE10(466-690)	N
	PP01G1560-T1	GH77(532-1438)	N
	PP01G1680-T1	GT2_Glycos_transf_2(19-194)	N
	PP01G3240-T1	GH47(164-818)	Y(1-32)
	PP01G3530-T1	GT29(294-517)	Y(1-32)
	PP01G4210-T1	GH28(239-425)	N
	PP02G0080-T1	GT33(11-506)	N
	PP02G0540-T1	GT29(120-349)	Y(1-39)
	PP02G0570-T1	CE1(786-1043)+CBM53(1118-1205)	Y(1-24)
	PP02G0740-T1	GH54(21-332)	N
	PP02G1580-T1	GH141(64-373)	N
	PP02G1800-T1	GT25(294-434)	N
	PP02G2640-T1	GH18(172-412)	N
	PP02G2660-T1	GH20(200-523)	Y(1-21)
	PP02G3430-T1	GT32(5-76)	N
	PP02G3580-T1	GT76(173-558)	N
	PP02G4180-T1	GT77(160-380)	N
	PP02G4210-T1	GT29(56-290)+GT29(479-710)	N
	PP02G4230-T1	GH13_20(91-447)	N
	PP02G4460-T1	GH35(84-421)	N
	PP03G0140-T1	GT32(557-632)	N
	PP03G0570-T1	GH20(377-774)	N
	PP03G0850-T1	AA15(18-252)	N
	PP03G0860-T1	GT43(111-261)	N
	PP03G2140-T1	GH141(61-386)	N
	PP03G2540-T1	CBM9(87-314)	Y(1-40)
	PP03G2790-T1	GH33(290-486)	N
	PP03G3010-T1	GH13_6(99-395)	N
	PP03G3020-T1	GT77(183-397)	Y(1-41)
	PP03G3390-T1	GT29(333-504)	N
	PP03G3530-T1	GT64(138-383)	N
	PP03G3580-T1	GT29(11-218)	N
	PP03G3790-T1	GT29(190-386)	Y(1-42)
	PP03G4170-T1	GH13_6(146-451)	N
	PP03G4690-T1	GH47(280-722)	N
	PP04G0270-T1	GH33(199-544)	N
	PP04G1080-T1	GT29(99-249)	N
	PP04G1690-T1	GT29(380-571)	N
	PP04G1860-T1	GH33(182-410)	N
	PP04G3120-T1	GT29(405-577)	Y(1-28)
	PP04G3160-T1	GH14(267-692)	Y(1-22)
	PP04G3220-T1	GT29(221-470)	N
	PP04G4270-T1	GT29(447-710)	N
	PP04G4320-T1	GT29(237-513)	Y(1-48)
	PP05G0670-T1	GT2_Glycos_transf_2(83-200)	N
	PP05G1090-T1	GH13_10(487-783)	N
	PP05G1570-T1	CBM20(69-153)	Y(1-18)
	PP05G1580-T1	CE4(70-203)	N
	PP05G2930-T1	AA6(4-149)	N
	PP05G3350-T1	GT29(704-862)	N
	PP05G3380-T1	GH2(206-1245)	N
	PP05G4460-T1	GH13_6(776-1062)	N
	PP06G1150-T1	GT29(242-482)	Y(1-38)
	PP06G2050-T1	GT29(330-503)	N
	PP06G2720-T1	GT5(2-446)	N
	PP06G2800-T1	GT29(253-492)	N
	PP06G3110-T1	CE1(32-204)	Y(1-22)
	PP06G3210-T1	GT28(468-652)	N
	PP06G3300-T1	GH43(356-585)	Y(1-30)
	PP06G4420-T1	GT29(344-518)	N
	PP07G0950-T1	GH31(630-1089)	N
	PP07G1330-T1	AA2(126-357)	N
	PP07G1920-T1	GH27(26-212)	Y(1-27)
	PP07G2100-T1	GT29(251-424)	N
	PP07G2530-T1	GT29(257-522)	N
	PP07G3130-T1	GT29(311-547)	N
	PP08G0530-T1	GT95(134-399)	N
	PP08G0660-T1	GT29(180-400)	N
	PP08G1510-T1	GT22(79-523)	N
	PP08G1600-T1	GT29(302-465)	N
	PP08G2510-T1	GT90(114-358)	Y(1-27)
	PP08G2550-T1	GT29(275-525)	N
	PP08G3090-T1	GT5(191-694)	Y(1-51)
	PP08G3130-T1	GH33(86-477)	N
	PP08G3520-T1	GT10(146-418)	Y(1-31)
	PP08G3680-T1	GT90(118-362)	Y(1-27)
	PP08G3760-T1	GH38(29-374)	Y(1-22)
	PP09G0420-T1	GT8(189-428)	N
	PP09G1380-T1	CE10(95-255)	Y(1-22)
	PP09G1820-T1	CE1(133-340)+CBM53(442-530)+CE1(711-971)	N
	PP09G2440-T1	GT7(280-432)	N
	PP09G3520-T1	GH79(722-1217)	Y(1-28)
	PP09G3810-T1	GT29(377-587)	N
	PP10G0330-T1	GT77(167-444)	N
	PP10G0530-T1	GT58(37-423)	N
	PP10G0670-T1	GT29(294-471)	N
	PP10G1430-T1	CBM20(113-199)	N
	PP10G1590-T1	GT2_Glycos_transf_2(50-176)	Y(1-64)
	PP10G2600-T1	GH43_24(40-312)	N
	PP10G2930-T1	GH14(138-620)	N
	PP10G3200-T1	GT29(289-553)	N
	PP10G3570-T1	CE1(28-289)	N
	PP10G3750-T1	GT23(179-352)	N
	PP10G3830-T1	CE12(18-237)	N
	PP11G0440-T1	GT29(250-553)	N
	PP11G0830-T1	GT24(1702-1949)	N
	PP11G1550-T1	CE1(35-296)	N
	PP12G1640-T1	GT5(348-858)	N
	PP12G1660-T1	GT31(192-422)	N
	PP12G1910-T1	GT5(45-543)	Y(1-20)
	PP12G1990-T1	AA2(105-322)	Y(1-42)
	PP12G2100-T1	GH27(141-343)	Y(1-31)
	PP12G2860-T1	GH125(70-501)	Y(1-23)
	PP13G0250-T1	GT47(322-652)	Y(1-29)
	PP13G0620-T1	GT4(222-399)	N
	PP13G0960-T1	CE11(267-389)+CE11(415-520)	N
	PP13G1750-T1	GT2_Glycos_transf_2(534-698)	N
	PP13G1770-T1	GH92(326-817)	N
	PP13G1860-T1	CE10(194-455)	Y(1-38)
	PP13G2380-T1	CBM20(188-269)	N
	PP13G2750-T1	GT29(204-412)	N
	PP14G0090-T1	GT2_Glycos_transf_2(772-894)	N
	PP14G0520-T1	AA2(25-258)	N
	PP14G2180-T1	GT29(278-436)	N
	PP15G0120-T1	GH54(42-355)	Y(1-27)
	PP15G0300-T1	GH37(103-681)	N
	PP15G0590-T1	GT4(242-385)	N
	PP15G0610-T1	GT19(48-279)	N
	PP15G0720-T1	GT29(377-552)	N
	PP15G0820-T1	GH13_8(539-839)	N
	PP15G1010-T1	GT47(541-925)	N
	PP15G1140-T1	GT29(413-511)	N
	PP15G2060-T1	GT14(160-453)	N
	PP15G2100-T1	GH47(113-530)	N
	PP16G0960-T1	CE13(56-384)	N
	PP16G1010-T1	GH13_11(357-742)	Y(1-32)
	PP16G1730-T1	CE1(841-1080)	Y(1-23)
	PP16G2020-T1	GT47(179-468)	N
	PP17G0150-T1	GT2_Glyco_trans_2_3(25-142)+GT29(431-604)	N
	PP17G0170-T1	GT50(130-415)	N
	PP17G0500-T1	GH13_20(256-536)	N
	PP17G0530-T1	GH36(488-814)	N
	PP17G0890-T1	GT4(339-485)	N
	PP17G1400-T1	GH13_13(428-840)	N
	PP17G2400-T1	GT29(137-372)	N
	PP17G2420-T1	GT10(212-533)	N
	PP17G2550-T1	GT47(21-314)	N
	PP18G1410-T1	GT1(229-500)	N
	PP18G1710-T1	GH99(56-420)	Y(1-39)
	PP18G2100-T1	GT29(147-348)	N
	PP18G2600-T1	GT29(262-464)	Y(1-41)
	PP19G0050-T1	GH33(248-550)	N
	PP19G0070-T1	GT90(103-266)+GT90(499-589)	N
	PP19G0260-T1	GH33(121-503)	N
	PP19G0960-T1	CE10(274-496)	N
	PP19G1910-T1	GT29(256-404)	N
	PP19G1990-T1	GH2(113-670)	N
	PP19G2230-T1	GH33(140-508)	N
	PP19G2240-T1	GT29(357-569)	Y(1-25)
	PP20G0170-T1	GT29(363-589)	N
	PP20G0210-T1	GT2_Glycos_transf_2(76-255)	N
	PP20G0310-T1	GT7(14-220)	N
	PP20G0520-T1	GT35(342-1053)	N
	PP20G1290-T1	GT22(73-494)	N
	PP20G1490-T1	GT29(310-534)	N
	PP20G1650-T1	GT95(244-381)	N
	PP20G2110-T1	GH3(71-307)	N
	PP20G2240-T1	GT77(161-379)	N
	PP21G0090-T1	GT4(323-453)	N
	PP21G0740-T1	GH35(54-364)	Y(1-24)
	PP21G1010-T1	GH18(59-379)	N
	PP21G1100-T1	GT29(160-372)	N
	PP21G1110-T1	GT2_Glyco_trans_2_3(685-853)	N
	PP21G1120-T1	GH47(232-668)	Y(1-27)
	PP21G1990-T1	GT22(26-418)	Y(1-30)
	PP21G2360-T1	GT29(577-788)	N
	PP22G0040-T1	GT20(142-611)	N
	PP22G0120-T1	GH1(50-461)	N
	PP22G0190-T1	CE1(41-201)	Y(1-29)
	PP22G0350-T1	GH31(211-719)	N
	PP22G0560-T1	GH33(154-469)	N
	PP22G1150-T1	GH50(179-590)	N
	PP22G1230-T1	CE10(575-839)	N
	PP22G1750-T1	GT29(268-483)	N
	PP22G2070-T1	GT31(27-172)	N
	PP23G0490-T1	GT90(154-426)	Y(1-39)
	PP23G0690-T1	GT35(196-932)	Y(1-40)
	PP23G1100-T1	GT77(158-459)	N
	PP23G2200-T1	GH13_8(229-530)	N
	PP23G2220-T1	CBM53(1025-1114)+GT5(1125-1575)	N
	PP23G2260-T1	GH13_6(346-630)	N
	PP24G0690-T1	GT43(34-196)	N
	PP24G0860-T1	GH13_6(947-1236)	Y(1-20)
	PP24G1260-T1	GT77(219-441)	N
	PP24G1440-T1	GT41(110-901)	N
	PP24G2010-T1	GT28(338-498)	Y(1-58)
	PP25G0440-T1	GH33(403-641)	N
	PP25G0640-T1	GT29(188-411)	N
	PP25G1180-T1	GH33(170-508)	N
	PP25G1770-T1	GT23(58-365)	N
	PP26G0010-T1	GT95(248-563)	N
	PP26G0510-T1	GT1(240-488)	N
	PP26G0830-T1	GH13_8(461-756)	N
	PP26G1230-T1	GH31(282-790)	N
	PP26G1430-T1	GT29(102-315)	Y(1-43)
	PP26G1490-T1	GT41(197-748)	Y(1-29)
	PP26G1690-T1	GT4(572-715)	N
	PP26G2210-T1	GT77(254-499)	N
	PP26G2370-T1	GT83(81-611)	N
	PP27G0820-T1	GT5(189-691)	N
	PP27G1990-T1	CE10(505-734)	N
	PP27G2070-T1	GT31(95-304)	N
	PP28G0530-T1	GT29(260-487)	N
	PP28G0870-T1	GT29(462-636)	N
	PP28G1220-T1	AA15(188-367)	N
	PP28G1450-T1	AA2(20-275)	N
	PP28G1890-T1	GT2_Glyco_trans_2_3(519-720)	Y(1-49)
	PP29G0150-T1	GH13_11(278-637)	N
	PP29G0240-T1	GT29(323-542)	N
	PP29G1110-T1	CBM20(99-184)+GH13_20(303-622)	N
	PP30G0070-T1	GT29(695-894)	Y(1-37)
	PP30G0670-T1	GT2_Glycos_transf_2(976-1132)	N
	PP30G1450-T1	GT29(979-1245)	N
	PP30G1670-T1	GH28(116-469)	N
	PP30G1740-T1	GT22(69-412)	N
	PP31G0080-T1	GT77(301-521)	N
	PP31G0290-T1	GT31(97-306)	N
	PP31G1410-T1	GT29(326-502)	N
	PP31G1630-T1	GH32(104-413)	N
	PP31G1680-T1	GT4(542-710)	N
	PP32G0950-T1	GT29(248-450)	N
	PP32G1590-T1	GT4(244-379)	N
	PP32G1890-T1	GH33(237-551)	N
	PP32G2010-T1	GH77(393-884)	N
	PP33G0390-T1	GT66(37-697)	N
	PP33G1300-T1	GT29(538-732)	N
	PP33G1430-T1	GT29(180-437)	N
	PP34G0040-T1	GT5(216-720)	N
	PP34G0620-T1	CE13(42-255)	Y(1-36)
	PP34G0870-T1	GH15(50-345)	N
	PP34G0900-T1	CE1(239-393)	N
	PP35G0340-T1	GT2_Glycos_transf_2(37-191)	N
	PP35G0380-T1	CBM20(275-355)	N
	PP35G0400-T1	CBM20(260-340)	N
	PP35G0530-T1	GT29(376-576)	N
	PP35G0990-T1	GT71(265-491)	N
	PP35G1000-T1	AA3(122-652)	N
	PP35G1150-T1	GH5_24(42-362)	Y(1-29)
	PP35G1270-T1	GT57(5-455)	N
	PP36G1060-T1	AA2(124-374)	Y(1-22)
	PP36G1490-T1	GH31(465-899)	N
	PP37G0300-T1	GT95(117-431)	N
	PP38G0730-T1	GT20(70-646)	N
	PP38G0760-T1	GH2(86-718)	Y(1-24)
	PP38G0800-T1	GT47(6-296)	N
	PP38G0820-T1	GT27(204-512)	N
	PP39G0380-T1	GT29(91-262)	N
	PP41G0160-T1	CBM53(576-662)+CBM53(739-826)+GT5(837-999)+GT5(1006-1290)	N
	PP41G0250-T1	CBM20(138-219)	Y(1-53)
	PP41G0270-T1	CBM20(127-213)	Y(1-18)
	PP41G0540-T1	CBM20(216-299)	N
	PP41G0550-T1	CBM20(1717-1801)+CBM20(1865-1947)+CBM20(2054-2138)+CBM20(2202-2284)	N
	PP41G0590-T1	GT29(306-503)	Y(1-23)
	PP41G0660-T1	CBM20(103-186)+CBM20(283-367)	N
	PP41G0750-T1	CE10(74-426)	N
	PP42G0080-T1	GT60(383-797)	N
	PP42G0310-T1	GT29(252-487)	N
	Amino acid positions are shown in parentheses.
	Annotation was performed using dbCAN2 meta server with HMMER (Zhang et al. 2018).

## Sheet: Table S8
	Table S8. List of histone-modifying enzymes based on the dbHiMo database.
	dbHiMo Gene Family		Pycnococcus provasolii	Ostreococcus tauri	Micromonas pusilla	Bathycoccus prasinos	Chloropicon primus	Chlamydomonas reinhardtii	Arabidopsis thaliana
	Histone acetyltransferase (GNAT)
		ELP3	1	1	1	1	1	1	1
		GCN5	1	1	1	1	1	1	1
	Histone acetyltransferase (MYST)
		Esa1	0	0	0	1	0	0	0
		MOF	2	3	3	2	2	2	2
		Tip60	1	0	0	0	0	0	0
	Histone deacetylase
		ClassI	3	2	2	2	2	4	6
		ClassIIA	0	1	0	0	2	0	0
		ClassIIB	3	2	3	2	0	8	8
		ClassIII	5	1	4	3	4	2	2
		ClassIV	0	2	2	1	2	2	1
	Histone methyltransferase
		PRMT_1	2	2	3	2	7	4	7
		PRMT_2	0	0	1	0	2	0	0
		SET1	4	2	3	1	3	4	9
		SET2	3	2	0	2	2	1	7
		SET5	0	0	0	0	0	0	0
	Histone demethylase
		JARID1	5	3	3	3	3	0	9
		JHDM1	0	0	0	0	1	0	0
		JHDM2	1	0	1	0	0	0	5
		JHDM3_JMJD2	2	1	2	2	1	2	1
		PHF2_PHF8	1	0	0	0	0	0	0
	Annotation was performed using blastp to the db HiMo database (Choi et al. 2015) with a cut-off: e-value < 1E-20.

## Sheet: Table S9
	Table S9. List of genes for SUVH family methyltransferase.
	Pycnococcus provasolii	Ostreococcus tauri	Micromonas pusilla	Bathycoccus prasinos	Chloropicon primus	Chlamydomonas reinhardtii
	PP01G1870	ND	XP_003056718.1	ND	ND	ND
	PP15G2460
	PP23G0920
	PP29G1400
	PP29G1800
	Annotation was performed using blastp to AtSUVHs (AtSUVH1-AtSUVH10) of A. thaliana with a cut-off: e-value < 1E-20.
	ND: Not detected.

## Sheet: Table S10
	Table S10. List of essential genes for meiosis
	dmc1	hop1	hop2	mer3	mnd1	msh4	msh5	rec8	spo11
	PP10G0700-T1	PP05G4030-T1	PP19G1040-T1	PP14G1690-T1	PP42G0390-T1	PP26G1160-T1	PP13G1890-T1	PP07G3730-T1	PP01G0960-T1
						PP26G1170-T1			PP12G1280-T1

[truncated: 1 more sheets: Table S11]
